# Supplementary material for: Live sperm trap microarray for high throughput imaging and analysis
Source: Royal Society of Chemistry journal article supplement (doi:10.1039/c8lc01204k), 2019-01-01
Supplement: c8lc01204k5.pdf [file c8lc01204k5.pdf]

## **Electronic Supplementary Information**

### **Live sperm trap microarray for high throughput imaging and analysis**

Jae Bem You, Yihe Wang, Christopher McCallum, Farhang Tarlan, Thomas Hannam, Alexander Lagunov, Keith Jarvi, David Sinton\*

### Estimation on the diffusion time of acridine orange (A.O.) molecule

The diffusion time ( $t$ ) was estimated using the following relationship:

$$t \approx \frac{x^2}{D}$$

where  $x$  is the mean distance traveled by the diffusing molecule and  $D$  is the diffusion coefficient of the molecule. Here,  $x$  was set to 50  $\mu\text{m}$  and  $D$  was set to  $4.2 \times 10^{-6} \text{ cm}^2/\text{s}$  in bulk water at 20  $^\circ\text{C}$ .

**Table S1.** Diffusion coefficients for various cell staining dyes [1]

| Dye          | $D$ [ $\text{cm}^2/\text{s}$ ] | $T$ [ $^\circ\text{C}$ ] |
|--------------|--------------------------------|--------------------------|
| Alexa 488    | 414                            | 25                       |
| Alexa 546    | 341                            | -                        |
| eGFP         | 95                             | 25                       |
| Fluorescein  | 436                            | 25                       |
| Rhodamine 6G | 426                            | 25                       |

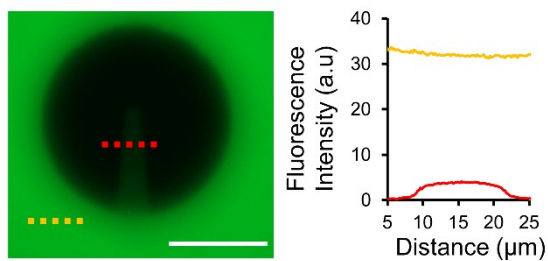

**Fig. S1** Fluorescence image of a trap and the intensity measured inside (red) and outside (yellow) of trap. The difference in intensity demonstrates that trap height is much lower than the main pillar height

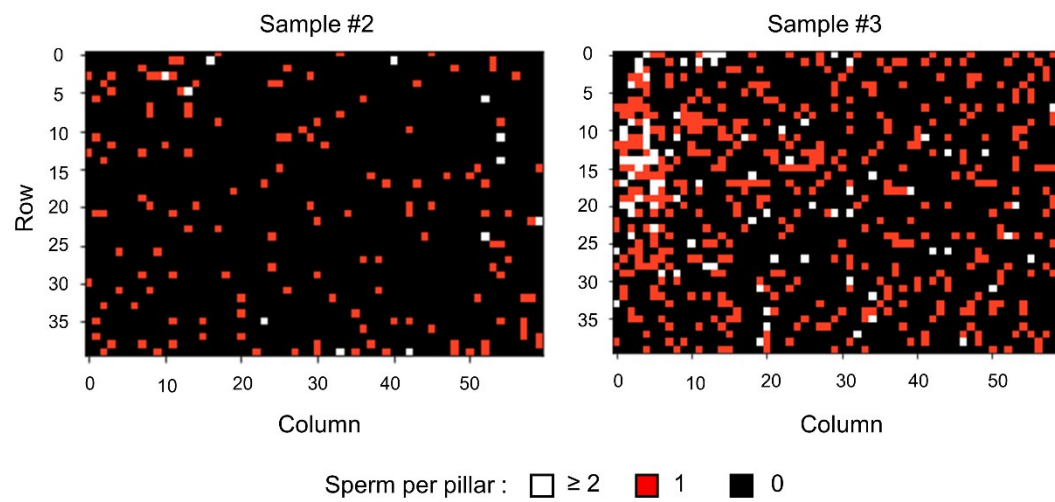

**Fig. S2** Mapping of pillars with sperm for trial #2 and trial #3

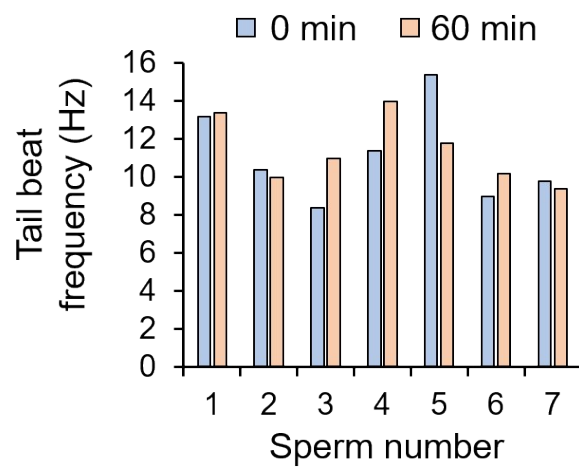

**Fig. S3** Tail beating frequency of 7 individual sperms at 0 min (blue) and at 60 min (orange) after trapping

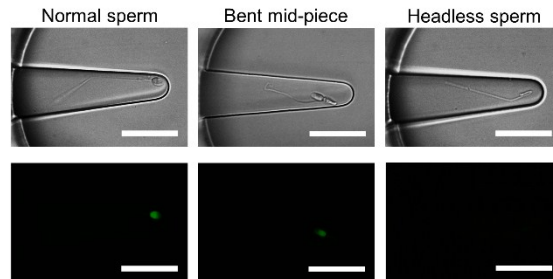

**Fig. S4** Brightfield (top) and fluorescence (bottom) of normal sperm, sperm with bent mid-piece and headless sperm

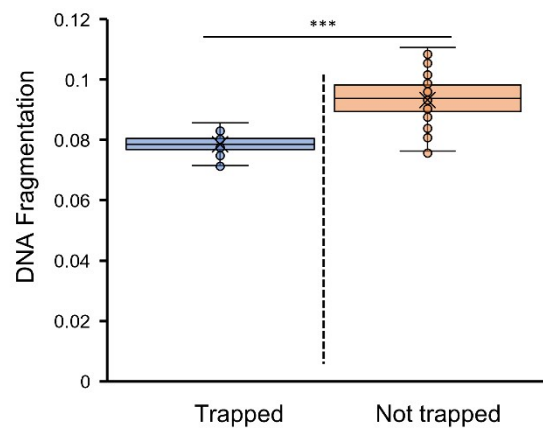

**Fig. S5** DNA fragmentation index of trapped and not-trapped sperm (n = 48 for both) \*\*\* $p < 0.001$ ;

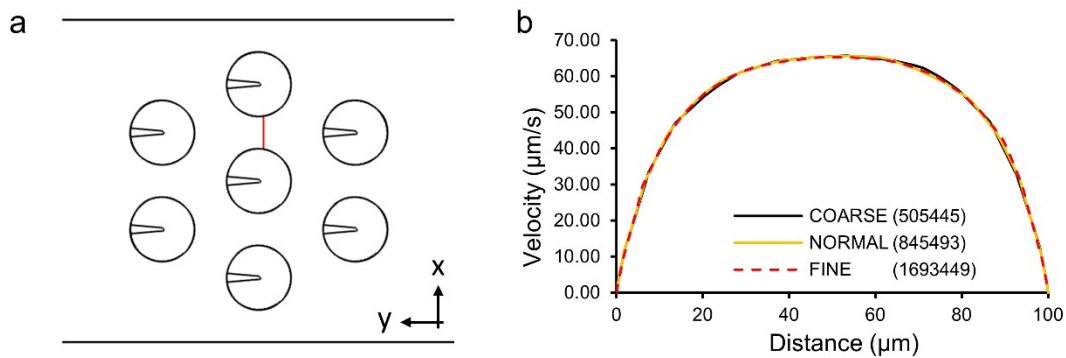

**Fig. S6** a) Location where the velocity was measured for mesh independence study b) Mesh independence study on the velocity of liquid inside the trap microarray. Predefined COARSE (mesh size = 505445), NORMAL (mesh size = 845493) and FINE (mesh size = 1693449) were used;

**Movie S1.** Tail beating of sperm with bent mid-piece in the trap

**Movie S2 ~ 4.** Tail beating of headless sperms in the trap

## References

1. Z. Petrášek, P. Schwille, *Biophys. J.* 2008, **94**, 1437.
